# Supplementary material for: Immunostimulatory effect of kumquat (Fortunella crassifolia) and its constituents, β-cryptoxanthin andR-limonene
Source: Royal Society of Chemistry journal article supplement (doi:10.1039/c8fo01971a), 2018-11-23
Supplement: c8fo01971a1.pdf [file c8fo01971a1.pdf]

## Fig. S1

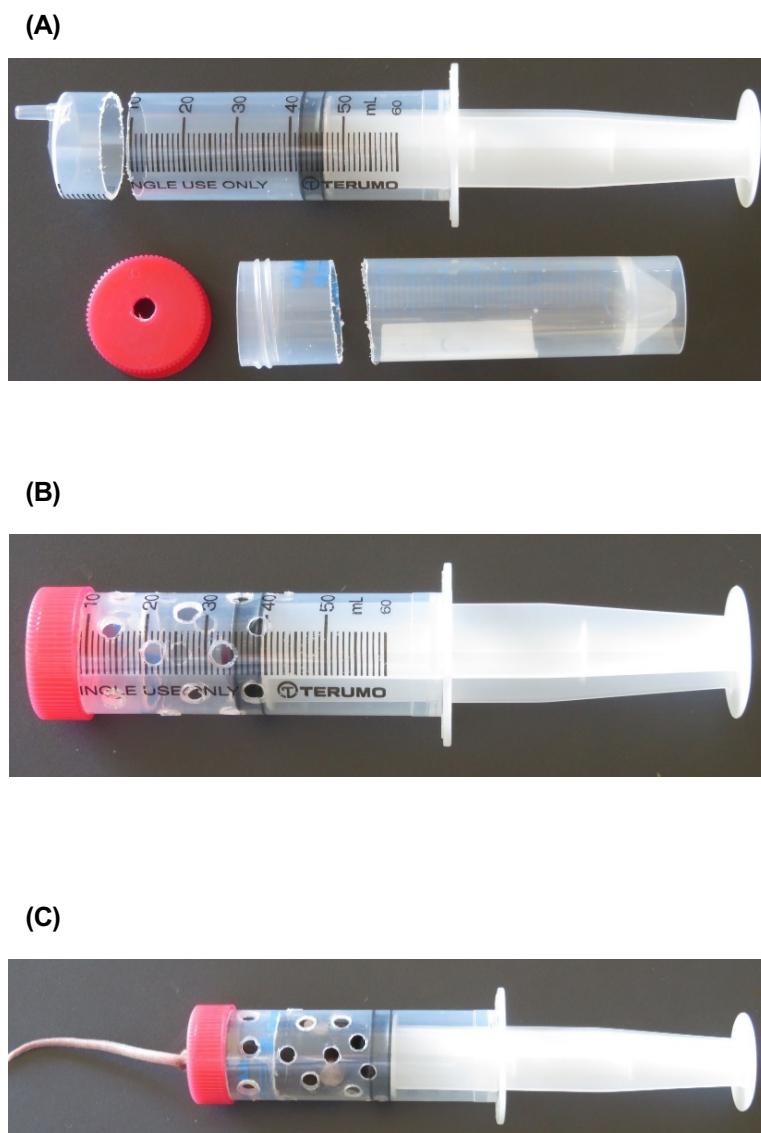

Fig. s1 Structure of the restraint cage.

The restraint cage was manufactured using a 50 mL syringe (Terumo Corporation, Tokyo, Japan) and a 50 mL polypropylene centrifuge tube (Sarstedt, Tokyo, Japan).

(a) The tip of the syringe was cut, and the lower part of the centrifuge tube was cut too. A hole to pass a murine tail was opened in the center of the centrifuge tube cap.

(b) The tip of the tube was fitted in a syringe. Furthermore, air holes were opened on multiple parts.

(c) This restraint cage can regulate the position of the plunger of the syringe according to body length in mouse and can immobilize mouse to limit movement.
